# Supplementary material
Source: PubMed Central journal article supplement (PMC9782752)

Disclosure Purpose: CIRCCQO/2022/008999

Summary of Interests

**Company or Organization**

| Entity                            | Type       |
|-----------------------------------|------------|
| Columbia University               | Employment |
| <i>Title:</i> Assistant Professor |            |

Additional Questions:

- Are you the corresponding author?  
Yes.
- I confirm I have disclosed all direct support for the present manuscript (e.g. funding, provision of study materials, medical writing, article processing charges, etc.) There is no time limit for this item.  
Yes
- Was any individual paid to provide professional writing assistance with this manuscript?  
No.
- Have you or your institution received equipment, materials, drugs, or services in direct support of the work in the manuscript (without time limit) not disclosed above?  
No.
- In the past 36 months, have you received equipment, materials, drugs, medical writing, gifts or other services from for-profit or not-for-profit third parties whose interests may be affected by the content of the manuscript not disclosed above?  
No.
- Are there other financial or non-financial interests that readers could perceive to have influenced, or that give the appearance of potentially influencing, what you wrote in the submitted work not disclosed above.  
No.

Certification

I certify that the information provided in this disclosure is complete and accurate.

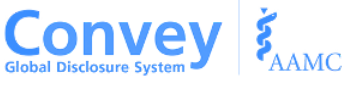

Supplement: NIHMS1838280-supplement-Electronic_Disclosure_Form_for_Billy_Caceres.pdf [file NIHMS1838280-supplement-Electronic_Disclosure_Form_for_Billy_Caceres.pdf]
