# Supplementary material
Source: PubMed Central journal article supplement (PMC9782752)
Supplement: NIHMS1838280-supplement-Supplemental_Publication_Material.pdf [file NIHMS1838280-supplement-Supplemental_Publication_Material.pdf]

**Supplemental Table 1. Differences across sample characteristics among cisgender participants with complete data for sexual orientation module to those who responded “don’t know” or “refused” in the Behavioral Risk Factor Surveillance System (N=428,361).**

| <i>Sample characteristics</i>               | Complete data for sexual orientation<br>module<br>(n=421,536) | “Don’t Know”<br>(n=2,916) | “Refused”<br>(n=3,909) |
|---------------------------------------------|---------------------------------------------------------------|---------------------------|------------------------|
|                                             | Mean (SD)/Weighted % (95% CI)                                 |                           |                        |
| Age (range 18-80 years) <sup>*†</sup>       | 49.7 (17.0)                                                   | 55.2 (13.9)               | 53.9 (15.8)            |
| Race/ethnicity <sup>*†</sup>                |                                                               |                           |                        |
| Non-Hispanic White                          | 66.4% (66.0-66.8)                                             | 19.5% (17.3-21.9)         | 42.0% (38.8-45.2)      |
| Non-Hispanic Black                          | 12.4% (12.1-12.6)                                             | 7.3% (5.8-9.2)            | 9.3% (7.7-11.1)        |
| Hispanic                                    | 13.9% (13.6-14.2)                                             | 61.7% (58.0-65.3)         | 36.1% (32.6-39.6)      |
| Non-Hispanic Asian/Pacific<br>Islander      | 4.7% (4.5-4.9)                                                | 10.2% (7.7-13.3)          | 10.2% (8.0-13.0)       |
| Non-Hispanic Other race                     | 2.6% (2.5-2.7)                                                | 1.3% (0.9-1.8)            | 2.5% (1.8-3.4)         |
| Annual income <sup>*†</sup>                 |                                                               |                           |                        |
| < \$15,000                                  | 8.6% (8.4-8.8)                                                | 32.4% (28.6-36.5)         | 21.2% (18.6-24.0)      |
| \$15,000 - \$24,999                         | 15.0% (14.7-15.2)                                             | 33.9% (30.2-37.8)         | 27.7% (24.6-30.9)      |
| \$25,000 - \$34,999                         | 9.8% (9.6-10.0)                                               | 13.6% (11.3-16.3)         | 12.6% (10.5-15.0)      |
| \$35,000-\$49,999                           | 13.2% (13.0-13.4)                                             | 9.5% (7.1-12.5)           | 12.5% (10.5-14.8)      |
| ≥ \$50,000                                  | 53.4% (53.1-53.8)                                             | 10.6% (8.6-13.0)          | 26.0% (23.3-29.0)      |
| Education <sup>*†</sup>                     |                                                               |                           |                        |
| Did not graduate high school                | 10.2% (9.9-10.5)                                              | 56.0% (52.1-59.9)         | 31.2% (28.0-34.7)      |
| Graduated high school                       | 26.9% (26.6-27.2)                                             | 25.8% (22.4-29.3)         | 28.5% (25.5-31.6)      |
| Attended college/technical<br>school        | 32.2% (31.9-32.5)                                             | 10.9% (8.9-13.2)          | 21.5% (18.9-24.4)      |
| Graduated college/technical<br>school       | 30.7% (30.4-31.0)                                             | 7.3% (6.1-8.8)            | 18.8% (16.6-21.1)      |
| Healthcare insurance coverage <sup>*†</sup> | 90.3% (90.1-90.5)                                             | 69.7% (65.6-73.6)         | 82.5% (79.6-85.1)      |
| Last routine check-up <sup>*</sup>          |                                                               |                           |                        |
| Within past year                            | 75.5% (75.2-75.8)                                             | 76.7% (72.9-80.1)         | 79.3% (76.5-81.9)      |
| Within past two years                       | 11.7% (11.5-11.9)                                             | 10.8% (8.4-13.7)          | 9.3% (7.6-11.2)        |
| Within past five years                      | 6.8% (6.7-7.1)                                                | 5.9% (4.2-8.2)            | 6.6% (5.0-8.7)         |
| Five or more years ago                      | 5.4% (5.2-5.5)                                                | 4.2% (2.7-6.6)            | 3.6% (2.6-5.1)         |
| Never                                       | 0.6% (0.5-0.7)                                                | 2.4% (1.5-4.0)            | 1.2% (0.7-1.9)         |
| Lifetime smoker <sup>*†</sup>               | 42.2% (41.9-42.5)                                             | 24.7% (21.5-28.2)         | 31.8% (28.8-35.1)      |

|                                    |                   |                   |                   |
|------------------------------------|-------------------|-------------------|-------------------|
| Body mass index                    |                   |                   |                   |
| Underweight                        | 1.5% (1.4-1.6)    | 2.4% (1.3-4.2)    | 1.8% (1.0-2.9)    |
| Normal weight                      | 29.9% (29.6-30.2) | 24.8% (21.8-28.1) | 30.0% (27.1-33.3) |
| Overweight                         | 36.3% (35.9-36.6) | 40.6% (36.6-44.7) | 36.7% (33.5-40.0) |
| Obese                              | 32.3% (32.1-32.6) | 32.2% (28.5-36.2) | 31.5% (28.4-34.8) |
| Hypertension diagnosis             |                   |                   |                   |
| Yes                                | 35.2% (34.9-35.5) | 41.5% (37.8-45.5) | 37.9% (34.8-41.1) |
| Anti-hypertensive medication use ‡ |                   |                   |                   |
| Yes                                | 78.1% (77.7-78.6) | 84.2% (79.7-87.8) | 84.3% (80.1-87.7) |

---

Note. Statistical significance  $p < 0.001$ . Analyses include cisgender participants in the BRFSS who had complete data for gender identity. The sample size for this exploratory analysis differs from the final analytic sample because it includes individuals who responded “don’t know” and “refused” to the sexual identity item. These individuals were excluded from the main analyses of the manuscript.

\* = Statistically significant difference between those with complete data versus those who responded “don’t know”

† = Statistically significant difference between those with complete data versus those who responded “refused”

‡ = Analyses only include participants who reported a diagnosis of hypertension
